# Supplementary material for: Identification of Genes Associated with Resistance to Persulcatusin, a Tick Defensin from Ixodes persulcatus
Source: Microorganisms. 2024 Feb 19;12(2):412. doi: 10.3390/microorganisms12020412 (PMC10892762; doi:10.3390/microorganisms12020412)
Supplement: Supplementary file 1 [file microorganisms-12-00412-s001.zip › Shimoda IP Supplementary Table.xlsx]

## Sheet: Supplementary 1
		Supplementary Table S1. MICs of IP (linear and oxidized form) agasint S. aureus
			MIC (μg/mL)
			ATCC29213	JE2
		IP linear (day 0)	2	2
		IP oxidized (day 7)	1	1
